# Supplementary material for: Evaluating OzHarvest’s primary-school Food Education and Sustainability Training (FEAST) program in 10–12-year-old children in Australia: protocol for a pragmatic cluster non-randomized controlled trial
Source: Springer Nature journal article supplement (doi:10.1186/s12889-021-10302-0), 2021-05-22

# FEAST Kids

---

Welcome to the FEAST survey!

Thank you for participating in the FEAST program.

On the following pages, there are some questions we would like to ask you, if you do not understand a question, please ask for help from the classroom teacher.

This survey asks about what you eat and your school lunches.

Your individual information will be kept private and confidential.

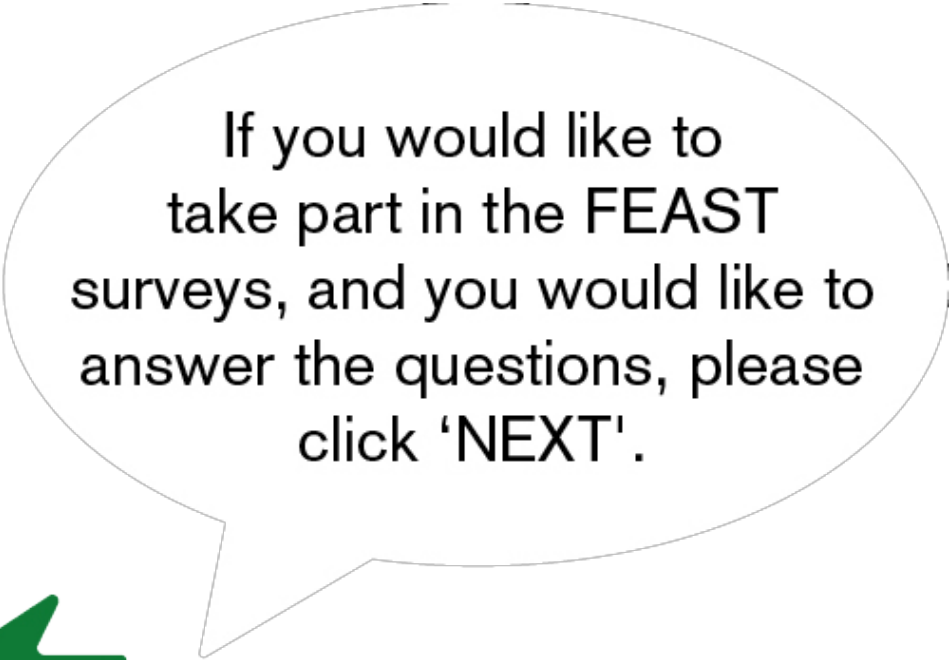

If you would like to  
take part in the FEAST  
surveys, and you would like to  
answer the questions, please  
click 'NEXT'.

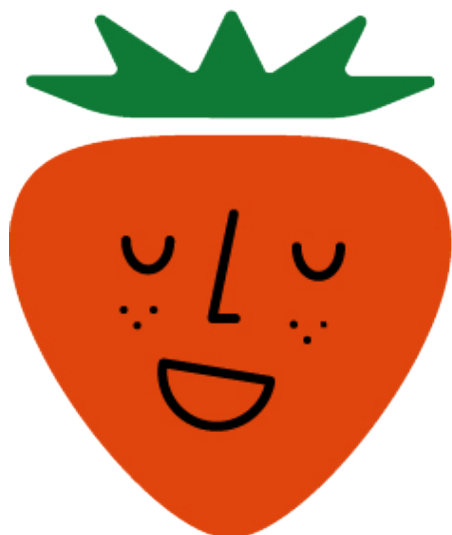

---

Your School: \_\_\_\_\_

# Background

---

First Name

---

Surname

---

Your school email address:

---

Please enter your school email address again:

---

OOPS! The email address in the two boxes are not the same!  
Please make sure that you type your email address correctly in both boxes.

---

What grade are you in?

- Grade 5
- Grade 6
- Other

---

What grade are you in?

---

---

How old are you?

- 9
- 10
- 11
- 12
- Other

---

How old are you?

---

---

What is your gender?

- Boy
- Girl
- Prefer not to say

---

If you speak another language at home, other than English, please tell us which language it is.

---

# Nutrition

Think about what you ate yesterday.  
How many serves of fruit do you USUALLY eat, each day?

**WHAT IS A SERVE OF FRUIT?**  
A standard serve is about 150g (350kJ) or:



The infographic illustrates five examples of a standard fruit serve (approximately 150g or 350kJ):

- 1 MEDIUM apple
- 1 CUP of Dole Peach Slices
- 2 SMALL kiwis
- 1 MEDIUM banana
- 2 SMALL peaches

- I don't eat fruit
- 1 serve or less
- 2 serves
- 3 serves
- 4 serves or more

Think about what you ate yesterday.  
How many serves of vegetables do you USUALLY eat, each day?

## WHAT IS A SERVE OF VEGETABLES?

A standard serve is about 75g (100-350kJ) or:

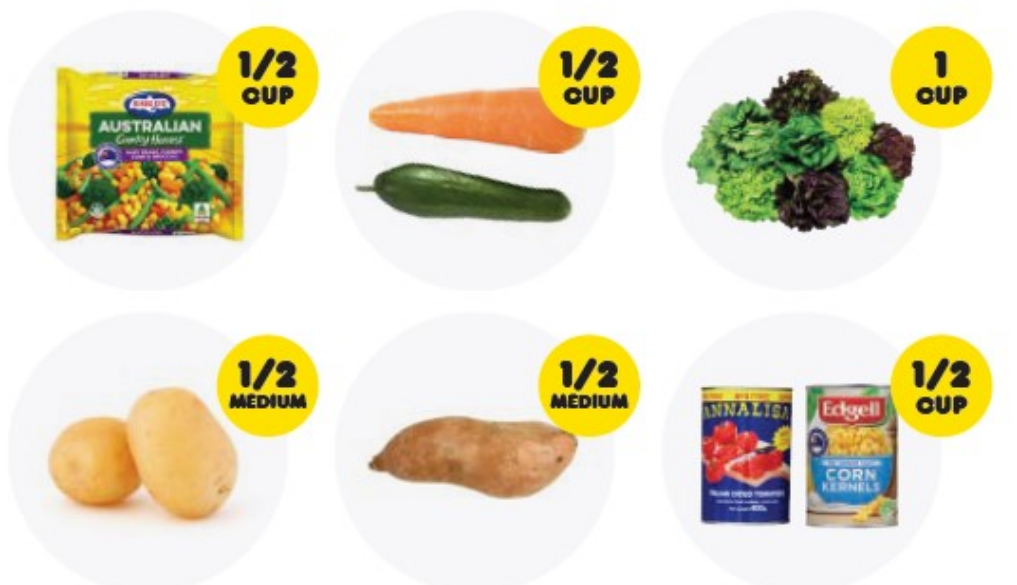

*\*With canned varieties, choose those with no added salt.*

- I don't eat vegetables
- 1 serve or less
- 2 serves
- 3 serves
- 4 serves
- 5 serves or more

Please indicate if you ate this fruit yesterday, by ticking the box or boxes that apply to you.

- Apple
- Apricot
- Banana
- Grapes
- Kiwi fruit
- Mandarin
- Nectarine
- Orange
- Peach
- Pineapple
- Plum
- Rockmelon
- Strawberries
- Watermelon
- Other

What other types of fruit do you eat?

---

Please indicate if you ate this vegetable yesterday, by ticking the box or boxes that apply to you.

- Beans (green)
- Beetroot
- Broccoli
- Brussel sprouts
- Cabbage
- Capsicum
- Carrot
- Cauliflower
- Celery
- Chinese greens
- Corn
- Cucumber
- Eggplant
- Legumes (baked beans, chickpeas, lentils, kidney beans)
- Lettuce
- Mushroom
- Peas
- Potato (not hot chips)
- Potato fried eg hot chips/ french fries/wedges
- Pumpkin
- Spinach
- Sweet potato
- Tomato
- Zucchini
- Squash
- Other

---

What other types of vegetables do you eat?

\_\_\_\_\_

---

How many serves of fruit SHOULD you eat every day?

- I don't know
- 1 serve
- 2 serves
- 3 serves
- 4 serves or more

---

How many serves of vegetables SHOULD you eat every day?

- I don't know
- 1 serve
- 2 serves
- 3 serves
- 4 serves
- 5 serves or more

# Cooking Skills

|                                     | Yes                   | No                    | Unsure                |
|-------------------------------------|-----------------------|-----------------------|-----------------------|
| I can make a snack with fruit.      | <input type="radio"/> | <input type="radio"/> | <input type="radio"/> |
| I can make a snack with vegetables. | <input type="radio"/> | <input type="radio"/> | <input type="radio"/> |
| I can help my family make a meal.   | <input type="radio"/> | <input type="radio"/> | <input type="radio"/> |
| I can make a salad.                 | <input type="radio"/> | <input type="radio"/> | <input type="radio"/> |
| I can cut up food.                  | <input type="radio"/> | <input type="radio"/> | <input type="radio"/> |
| I can measure ingredients.          | <input type="radio"/> | <input type="radio"/> | <input type="radio"/> |
| I can follow recipe directions.     | <input type="radio"/> | <input type="radio"/> | <input type="radio"/> |

How often do you help cook dinner at home?

- Never
- Once in a while
- A few times a week
- Every night or almost every night

# Food Waste

---

On a normal day, how much of your lunch do you eat at school?

- Only a little
- About half of it
- Most of it
- All of it

---

Why do you only eat that much?

Click on as many answers that apply to you.

- There is too much food for me to eat
- I do not like it
- I want to go out and play
- I don't have enough time to finish it
- Other reasons

---

What other reasons are there for you not finishing all your lunch?

---

On a normal day, what do you do with the food that you don't eat at school?

- Throw out at school
- Take back home
- Throw out somewhere else (like on the way home)
- Eat it on the way home
- Give it to my friends
- Put it in compost bin
- I always eat all of my recess and lunch

---

Why do you throw it out at school?

Click on as many answers that apply to you.

- Teacher told me to
- Parents told me to
- I don't want my parents to see I have left overs
- That's what my friends do
- That's what my brothers and/or sisters do
- That's what I see other students doing
- I don't like leftover food in my bag



---

Why do you take it back home?

Click on as many answers that apply to you.

- Parents told me to
- Teacher told me to
- That's what my friends do
- That's what my brothers and/or sisters do
- That's what I see other students doing
- So that I can eat it at home
- So that I don't waste it

---

Why do you throw it out somewhere else?

Click on as many answers that apply to you.

- Teacher told me to
- Parents told me to
- I don't want my parents to see I have left overs
- That's what my friends do
- That's what my brothers and/or sisters do
- That's what I see other students doing

---

Why do you throw it in the composte bin?

Click on as many answers that apply to you.

- Teacher told me to
- Parents told me to
- That's what my friends do
- That's what my brothers and/or sisters do
- That's what I see other students doing
- It's good for the planet/earth

---

What does 'food waste' mean to you?

---

Does the food that is thrown away, affect the environment?

- Yes
- No
- Unsure

---

How do you think food waste affects the environment?

---

What is the correct order a strawberry travels to get to your plate?

- farm, home, transport, supermarket
- transport, farm, supermarket, home
- supermarket, farm, home, transport
- farm, transport, supermarket, home

---

Do you eat blemished or imperfect fruits and vegetables?

- Yes
- No

---

Which bananas would you eat or use in a recipe?

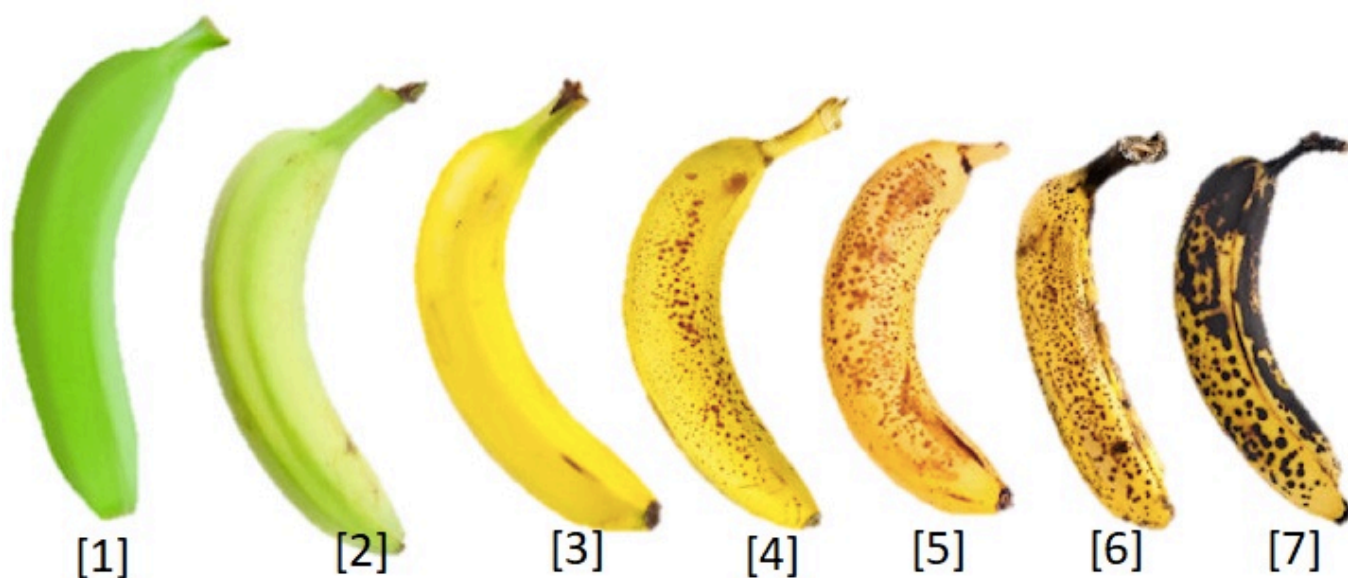

---

Click any banana(s) that you would eat or use in a recipe?

- None of them
- [1]
- [2]
- [3]
- [4]
- [5]
- [6]
- [7]

Please remember to click on the "NEXT" button!

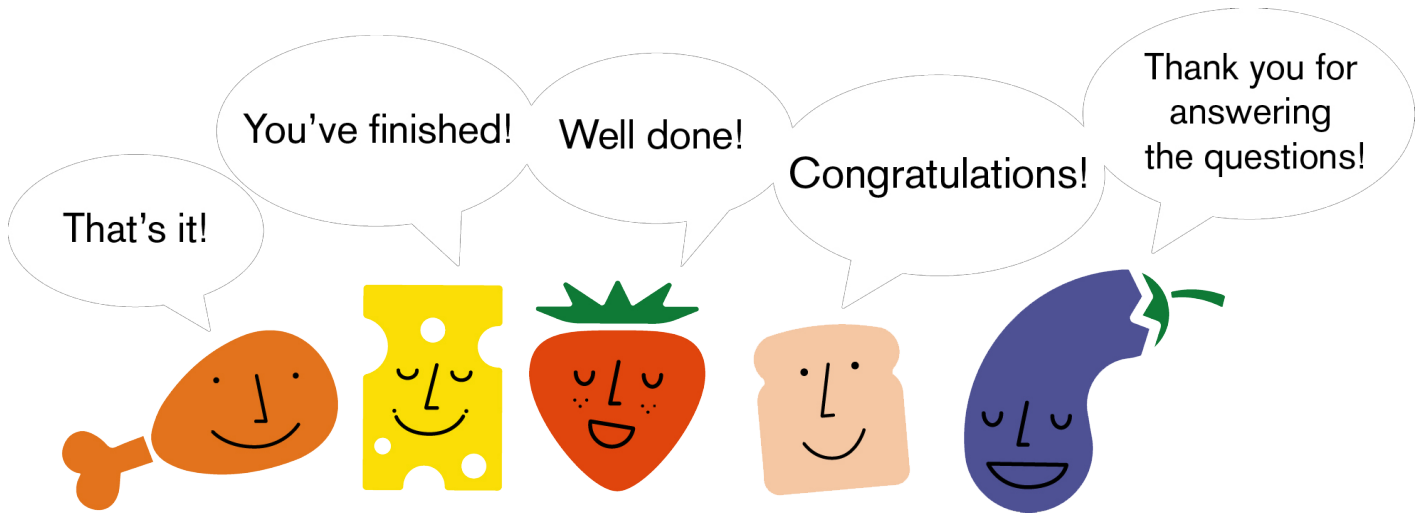

Supplement: MOESM5 [file 19188064]
