# Supplementary material for: Evaluating OzHarvest’s primary-school Food Education and Sustainability Training (FEAST) program in 10–12-year-old children in Australia: protocol for a pragmatic cluster non-randomized controlled trial
Source: Springer Nature journal article supplement (doi:10.1186/s12889-021-10302-0), 2021-05-22
Supplement: MOESM1 [file 19188064]

| Program name<br>(Country)                                             | School-<br>Based | Curriculum-<br>integrated | Nutrition<br>Education | Sustainability<br>Education | Experiential<br>Activities | Food Systems/<br>Production | Food<br>Waste | Community<br>Involvement |
|-----------------------------------------------------------------------|------------------|---------------------------|------------------------|-----------------------------|----------------------------|-----------------------------|---------------|--------------------------|
| <i>Food Education and Sustainability Training (FEAST) (Australia)</i> | ✓                | ✓                         | ✓                      | ✓                           | ✓                          | ✓                           | ✓             | ✓                        |
| <i>Farm-to-School (US)</i> <sup>35</sup>                              | ✓                |                           | ✓*                     |                             | ✓                          | ✓                           | ✓*            | ✓                        |
| <i>The Healthy Planet, Healthy Youth (US)</i> <sup>29</sup>           | ✓                | ✓                         |                        | ✓                           |                            | ✓                           | ✓             |                          |
| <i>Food for Life (UK)</i> <sup>33</sup>                               | ✓                | ✓                         |                        | ✓                           | ✓                          | ✓                           |               | ✓                        |
| <i>Farm to Cafeteria (Canada)</i> <sup>31</sup>                       | ✓                | ✓                         | ✓                      |                             | ✓                          | ✓                           |               | ✓                        |

Legend: Void implies the program did not include that component; \* Optional component
