# Supplementary material for: Evaluating OzHarvest’s primary-school Food Education and Sustainability Training (FEAST) program in 10–12-year-old children in Australia: protocol for a pragmatic cluster non-randomized controlled trial
Source: Springer Nature journal article supplement (doi:10.1186/s12889-021-10302-0), 2021-05-22
Supplement: MOESM3 [file 19188064]

| <b>Lesson No.</b> | <b>Title</b>                                  | <b>Activities (Theory and Practical)</b>                                                                                                                                                                                   |
|-------------------|-----------------------------------------------|----------------------------------------------------------------------------------------------------------------------------------------------------------------------------------------------------------------------------|
| Lesson 1          | The Essential Question and Scenario           | Introduce the unit essential question, scenario and student task                                                                                                                                                           |
| Lesson 2          | Understanding food waste                      | Knowledge - local food waste.<br>Behaviours – how to reduce food waste.<br>Food production – ‘farm to plate’ concept.<br>Cooking activity: Peach parfait                                                                   |
| Lesson 3-         | Change-makers and where does food come from?- | Change Makers:<br>OzHarvest and Ronni Kahn - What has she changed?<br>Where does food come from?<br>Cooking activity: Fruit Skewers with Natural Yoghurt or Banana Pikelets                                                |
| Lesson 4-         | Using STEM Thinking for Problem Solving-      | STEM thinking and science inquiry skills to be change-makers.<br>Creating a hypothesis.<br>Fun Food Science.<br>Creating a Wasty Recipe.<br>Cooking activity: Tzatziki Dip with Vegetable Sticks or Fast Fritters          |
| Lesson 5-         | Understanding food waste-                     | Facts on Food Waste.<br>Food waste report.<br>Fridge and fruit bowl audit.<br>Cooking activity: Bircher Muesli with Apples and Bananas or French Toast                                                                     |
| Lesson 6-         | Learning about healthy eating-                | What does healthy food mean to you?<br>What are the different food groups?<br>What Food Groups do you eat?<br>Cooking activity: Salad Roll or Rainbow Honey Soy Noodle Stir Fry                                            |
| Lesson 7          | Generating Ideas                              | Designing a recipe.<br>Cooking activity: Crunchy Noodle Salad or Tortilla Wraps with Butter Bean Hummus                                                                                                                    |
| Lesson 8          | Finalising the recipe                         | Designing FEAST Recipe.<br>Drafting the recipe.<br>Final recipe write up.                                                                                                                                                  |
| Lesson 9          | Recipe Presentation                           | Develop presentation using PowerPoint, Key Note or Google Slides.<br>Title slide.<br>Key Food Waste Facts.<br>Introduction.<br>Present recipe and why it is healthy and how it reduces food waste.<br>Present FEAST recipe |
| Lesson 10         | Debrief                                       | Students reflect on their learning and all aspects involved researching and designing recipes                                                                                                                              |
