# Supplementary material for: Evaluating OzHarvest’s primary-school Food Education and Sustainability Training (FEAST) program in 10–12-year-old children in Australia: protocol for a pragmatic cluster non-randomized controlled trial
Source: Springer Nature journal article supplement (doi:10.1186/s12889-021-10302-0), 2021-05-22
Supplement: MOESM4 [file 19188064]

| <b>Practical Guide Components</b> | <b>Descriptions and examples (e.g.)</b>                                                                                                                                                                                                                                                                                                                                                                                                                                                                                                       |
|-----------------------------------|-----------------------------------------------------------------------------------------------------------------------------------------------------------------------------------------------------------------------------------------------------------------------------------------------------------------------------------------------------------------------------------------------------------------------------------------------------------------------------------------------------------------------------------------------|
| Risk assessment checklist         | Checking allergies, intolerances or dietary requirements e.g. nut allergies<br>Hygiene and food handling e.g. hand washing<br>Food safety storage and contamination e.g. clean containers<br>Hot water e.g. scolds<br>Kitchen knives e.g. cuts<br>Graters e.g. grating skin<br>Electric frying pans e.g. burns<br>Trip hazards e.g. frying pan power cord<br>Lifting Injuries e.g. kitchen kit boxes<br>Chemical hazards e.g. detergents<br>Fire/Emergency e.g. fire blanket, extinguisher, exit plan<br>Students e.g. challenging behaviours |
| Food cost saving tips             | Shop at local supermarkets and buy fruits and vegetables from the 'odd bunch'.                                                                                                                                                                                                                                                                                                                                                                                                                                                                |
| Food waste reduction tips         | Buy only what you need, shop with a list, freeze leftover food.                                                                                                                                                                                                                                                                                                                                                                                                                                                                               |
| Food orders                       | FEAST practical cold and hot recipe food order list.                                                                                                                                                                                                                                                                                                                                                                                                                                                                                          |
| Preparation                       | List of procedures for teachers for: before/during/after sessions.                                                                                                                                                                                                                                                                                                                                                                                                                                                                            |
