# Supplementary material for: Evaluating OzHarvest’s primary-school Food Education and Sustainability Training (FEAST) program in 10–12-year-old children in Australia: protocol for a pragmatic cluster non-randomized controlled trial
Source: Springer Nature journal article supplement (doi:10.1186/s12889-021-10302-0), 2021-05-22

# FEAST Evaluation

## What do you think about FEAST?

|                                               | Yes                   | No                    | Unsure                |
|-----------------------------------------------|-----------------------|-----------------------|-----------------------|
| Were the FEAST activities easy to read?       | <input type="radio"/> | <input type="radio"/> | <input type="radio"/> |
| Were the FEAST activities easy to understand? | <input type="radio"/> | <input type="radio"/> | <input type="radio"/> |
| Was the FEAST website easy to use?            | <input type="radio"/> | <input type="radio"/> | <input type="radio"/> |
| Was the FEAST program fun?                    | <input type="radio"/> | <input type="radio"/> | <input type="radio"/> |

Did you participate in the cooking activities?

- Yes  
 No

Did you enjoy cooking?

- Yes  
 No

Did you cook some of the classroom recipes at home?

- Yes  
 No

Did you learn something about food preparation and cooking that you did not know before?

- Yes  
 No

Name one new thing you learnt to do during the FEAST cooking activities.

---

Which was your favourite recipe?

Choose as many as you like.

- All of them
- Fruit skewers
- Tzatziki dip with vegetable sticks
- Bircher muesli
- Rainbow salad roll
- Peach parfait
- Fast fritters
- Crunchy Noodle Salad
- French Toast
- Banana Pikelets
- Tortilla Wraps
- None of them.

---

Did your class create a cookbook?

- Yes
- No

---

Did you enjoy creating the cookbook?

- Yes
- No

---

On a scale of 0 to 10, how likely are you to recommend the FEAST program to others?

- 10, Extremely likely to Recommend
- 9
- 8
- 7
- 6
- 5
- 4
- 3
- 2
- 1
- 0, Not likely to Recommend

---

Would you like to do the FEAST program again?

- Yes
- No

Don't Forget to click on the "FINISH" button

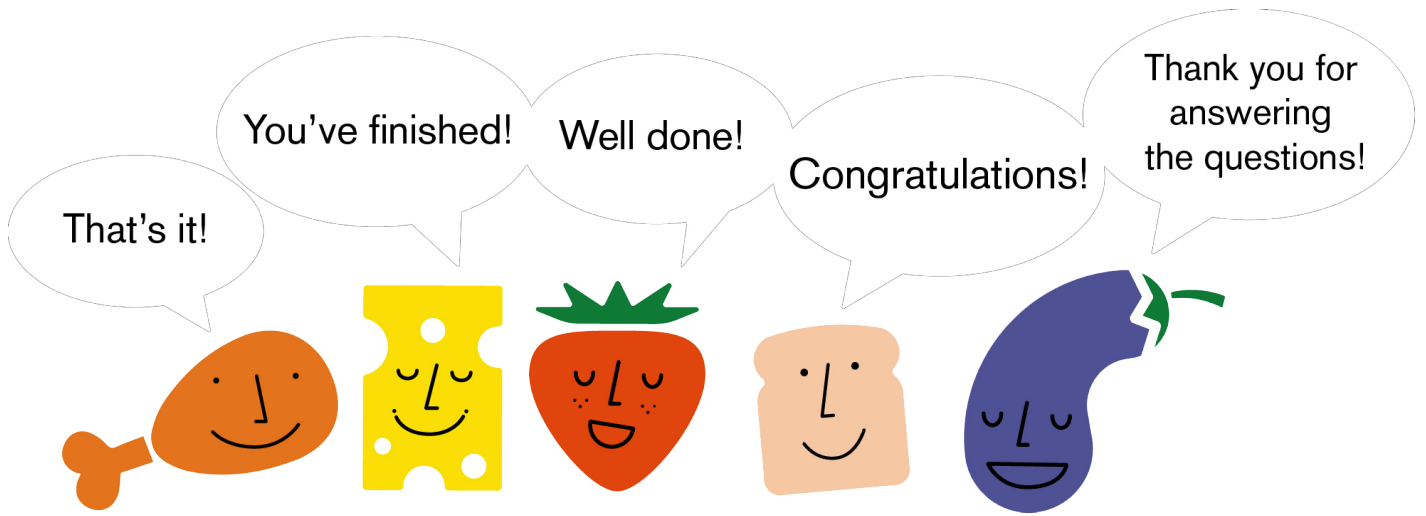

Supplement: MOESM6 [file 19188064]
