# Supplementary material for: Evaluating OzHarvest’s primary-school Food Education and Sustainability Training (FEAST) program in 10–12-year-old children in Australia: protocol for a pragmatic cluster non-randomized controlled trial
Source: Springer Nature journal article supplement (doi:10.1186/s12889-021-10302-0), 2021-05-22
Supplement: MOESM7 [file 19188064]

# FEAST Teachers

---

WELCOME to the FEAST surveys!

Thank you for participating in the FEAST program.

Your feedback is invaluable as it helps us to improve the support and services OzHarvest provides to you, to deliver the FEAST program to your students.

On the following pages, there are some questions we would like to ask you.

If you do not understand a question, please contact the FEAST team at [feast@ozharvest.org](mailto:feast@ozharvest.org) or (02) 8880 9791.

Your personal identity and information will be kept private and confidential.

If you would like to take part in the FEAST surveys, and you would like to help us by answering the questions, please click 'NEXT'.

# Background

---

First Name

---

Surname

---

Email address

---

Please enter your email address again:

---

The emails entered did not match

Please ensure that the two email address entered above are exactly the same.

---

Would you like to receive a report of findings at the conclusion of the study?

- Yes  
 No

---

What is your gender?

- Male  
 Female  
 Prefer not to say
-

---

What year do you teach?

- Year 5
- Year 6
- Year 5/6
- Other

---

Which grade do you teach?

\_\_\_\_\_

---

How many students in your class?

\_\_\_\_\_

---

How many students in your class participated in the FEAST program?

\_\_\_\_\_

# FEAST teacher survey

---

Which type of FEAST training did you undertake?

- Face-to-Face
- Online
- Did not undertake training

---

The FEAST face-to-face training course prepared me to deliver the FEAST program in my classroom setting.

Please rate how strongly you agree/disagree with this statement.

- Strongly agree
- Agree
- Neutral
- Disagree
- Strongly disagree

---

The face-to-face Teacher Professional Development Training course delivered by OzHarvest was very effective.

Please rate how strongly you agree/disagree with this statement.

- Strongly agree
- Agree
- Neutral
- Disagree
- Strongly disagree

---

The FEAST online training course prepared me to deliver the FEAST program in my classroom setting.

Please rate how strongly you agree/disagree with this following statement.

- Strongly agree
- Agree
- Neutral
- Disagree
- Strongly disagree

---

The online Teacher Professional Development Training course delivered by OzHarvest was very effective.

Please rate how strongly you agree/disagree with this statement.

- Strongly agree
- Agree
- Neutral
- Disagree
- Strongly disagree

---

If you did not do any FEAST training, how easy/difficult was it to deliver the FEAST program in your classroom setting.

- Very easy
- Easy
- Neutral/Undecided
- Difficult
- Very Difficult

---

Did you teach the FEAST program on your own, or did you co-teach the FEAST program with another teacher/staff member from your school?

- Taught FEAST on my own
- Co-taught FEAST with another teacher/staff member from the school

---

How many FEAST lessons did you teach?

\_\_\_\_\_

---

How many cooking activities did you do with your class?

\_\_\_\_\_

---

Who co-taught the FEAST program with you?

- A teacher from my school
- A staff member from my school
- Other

---

How many FEAST theory lessons did they teach?

\_\_\_\_\_

---

Please tell us who the 'other' person was.

\_\_\_\_\_

---

How many FEAST cooking activities did they do?

\_\_\_\_\_

**Please rate the effectiveness of the FEAST resources provided, in aiding you to deliver the FEAST program.**

|                               | Did not receive resource | Very effective        | Effective             | Moderately effective  | Slightly effective    | Not effective         |
|-------------------------------|--------------------------|-----------------------|-----------------------|-----------------------|-----------------------|-----------------------|
| Online teacher portal         | <input type="radio"/>    | <input type="radio"/> | <input type="radio"/> | <input type="radio"/> | <input type="radio"/> | <input type="radio"/> |
| Online student portal         | <input type="radio"/>    | <input type="radio"/> | <input type="radio"/> | <input type="radio"/> | <input type="radio"/> | <input type="radio"/> |
| Student resources             | <input type="radio"/>    | <input type="radio"/> | <input type="radio"/> | <input type="radio"/> | <input type="radio"/> | <input type="radio"/> |
| FEAST unit of work            | <input type="radio"/>    | <input type="radio"/> | <input type="radio"/> | <input type="radio"/> | <input type="radio"/> | <input type="radio"/> |
| STEM lesson plans             | <input type="radio"/>    | <input type="radio"/> | <input type="radio"/> | <input type="radio"/> | <input type="radio"/> | <input type="radio"/> |
| FEAST practical guide         | <input type="radio"/>    | <input type="radio"/> | <input type="radio"/> | <input type="radio"/> | <input type="radio"/> | <input type="radio"/> |
| Kitchen Kit                   | <input type="radio"/>    | <input type="radio"/> | <input type="radio"/> | <input type="radio"/> | <input type="radio"/> | <input type="radio"/> |
| Cold recipe book              | <input type="radio"/>    | <input type="radio"/> | <input type="radio"/> | <input type="radio"/> | <input type="radio"/> | <input type="radio"/> |
| Hot recipe book               | <input type="radio"/>    | <input type="radio"/> | <input type="radio"/> | <input type="radio"/> | <input type="radio"/> | <input type="radio"/> |
| Optional learning experiences | <input type="radio"/>    | <input type="radio"/> | <input type="radio"/> | <input type="radio"/> | <input type="radio"/> | <input type="radio"/> |

---

Did you use the FEAST 'Online Learning' resources in response to COVID-19?

- Yes  
 No

---

Please rate the effectiveness of the 'Online Learning' resources, in aiding you to deliver the FEAST program.

- Did not receive resource  
 Very effective  
 Effective  
 Moderately effective  
 Slightly effective  
 Not effective

**Please rate how strongly you agree/disagree with the following statements...**

|                                                                                                | Strongly agree        | Agree                 | Neutral               | Disagree              | Strongly disagree     |
|------------------------------------------------------------------------------------------------|-----------------------|-----------------------|-----------------------|-----------------------|-----------------------|
| The FEAST program content satisfactorily aligned with the identified Year 5 & 6 KLAs.          | <input type="radio"/> | <input type="radio"/> | <input type="radio"/> | <input type="radio"/> | <input type="radio"/> |
| The FEAST program satisfactorily aligned with the cross-curriculum priority of sustainability. | <input type="radio"/> | <input type="radio"/> | <input type="radio"/> | <input type="radio"/> | <input type="radio"/> |
| I found the STEM lesson plans easy to implement in my classroom.                               | <input type="radio"/> | <input type="radio"/> | <input type="radio"/> | <input type="radio"/> | <input type="radio"/> |
| The FEAST program satisfactorily aligned with the general capabilities.                        | <input type="radio"/> | <input type="radio"/> | <input type="radio"/> | <input type="radio"/> | <input type="radio"/> |
| The FEAST program met my student's learning needs.                                             | <input type="radio"/> | <input type="radio"/> | <input type="radio"/> | <input type="radio"/> | <input type="radio"/> |
| The FEAST website was easy for me to navigate.                                                 | <input type="radio"/> | <input type="radio"/> | <input type="radio"/> | <input type="radio"/> | <input type="radio"/> |
| The FEAST program was easy to integrate into my daily classroom routine.                       | <input type="radio"/> | <input type="radio"/> | <input type="radio"/> | <input type="radio"/> | <input type="radio"/> |



**Please rate how strongly you agree/disagree with the following statements...**

|                                                        | Strongly agree        | Agree                 | Neutral               | Disagree              | Strongly disagree     |
|--------------------------------------------------------|-----------------------|-----------------------|-----------------------|-----------------------|-----------------------|
| My students found the FEAST activities easy to follow. | <input type="radio"/> | <input type="radio"/> | <input type="radio"/> | <input type="radio"/> | <input type="radio"/> |
| My students found the FEAST resources easy to use.     | <input type="radio"/> | <input type="radio"/> | <input type="radio"/> | <input type="radio"/> | <input type="radio"/> |
| My students found the FEAST activities engaging.       | <input type="radio"/> | <input type="radio"/> | <input type="radio"/> | <input type="radio"/> | <input type="radio"/> |
| My students found the FEAST website easy to navigate.  | <input type="radio"/> | <input type="radio"/> | <input type="radio"/> | <input type="radio"/> | <input type="radio"/> |

**Please rate how strongly you agree/disagree with the following statements...**

|                                                                                                   | Strongly agree        | Agree                 | Neutral               | Disagree              | Strongly disagree     |
|---------------------------------------------------------------------------------------------------|-----------------------|-----------------------|-----------------------|-----------------------|-----------------------|
| The FEAST program helped students to understand why it is important to be aware of food waste.    | <input type="radio"/> | <input type="radio"/> | <input type="radio"/> | <input type="radio"/> | <input type="radio"/> |
| Students are able to understand which behaviours can reduce food waste in the home and at school. | <input type="radio"/> | <input type="radio"/> | <input type="radio"/> | <input type="radio"/> | <input type="radio"/> |
| Students have increased knowledge and understanding of food waste on a local level.               | <input type="radio"/> | <input type="radio"/> | <input type="radio"/> | <input type="radio"/> | <input type="radio"/> |
| Students have increased knowledge and understanding of food waste on a global level.              | <input type="radio"/> | <input type="radio"/> | <input type="radio"/> | <input type="radio"/> | <input type="radio"/> |

**Following completion of FEAST, please rate how strongly you agree/disagree with the following statements...**

|                                                            | Strongly agree        | Agree                 | Neutral               | Disagree              | Strongly disagree     |
|------------------------------------------------------------|-----------------------|-----------------------|-----------------------|-----------------------|-----------------------|
| My students understand where food comes from.              | <input type="radio"/> | <input type="radio"/> | <input type="radio"/> | <input type="radio"/> | <input type="radio"/> |
| My students understand how to make healthier food choices. | <input type="radio"/> | <input type="radio"/> | <input type="radio"/> | <input type="radio"/> | <input type="radio"/> |
| My students understand how to prepare and cook food.       | <input type="radio"/> | <input type="radio"/> | <input type="radio"/> | <input type="radio"/> | <input type="radio"/> |
| My students understand how to minimise food waste.         | <input type="radio"/> | <input type="radio"/> | <input type="radio"/> | <input type="radio"/> | <input type="radio"/> |
| My students are eating more fruits and vegetables.         | <input type="radio"/> | <input type="radio"/> | <input type="radio"/> | <input type="radio"/> | <input type="radio"/> |
| My students are eating less 'junk' food.                   | <input type="radio"/> | <input type="radio"/> | <input type="radio"/> | <input type="radio"/> | <input type="radio"/> |

---

After completing the FEAST program, do you believe student food waste behaviours have decreased by:

- 0%, students waste the same amount of food
- 5%, students stopped a small amount of food going to waste
- 10%, students have reduced their food waste
- 20%, students are now food fighters and have reduced a lot of their food waste
- I don't know
- Other...

---

Did you create your class cookbook?

- Yes  
 No
- 

Can you please explain why you did not create a class cookbook?  
Please tick as many categories as apply.

- Did not have time to create a class cookbook.  
 Did not have skills to create a class cookbook.  
 Students did not have time to complete their recipes.  
 Students did not have the skills to complete their recipes.  
 I/we decided to do a different activity.  
 Not suitable for my class/group.  
 Other
- 

If you completed a different activity instead, please  
provide us with information about the activity you  
chose for your students.

---

---

Did your class do a class cookbook launch?

- Yes  
 No
- 

Who did you invite to the launch?  
Please tick as many categories as apply.

- Only our class.  
 Classes that participated in FEAST.  
 Only Year 5 and 6 classes.  
 Whole school.  
 Parents/caregivers who helped with FEAST.  
 Parents and Citizens (P&C) or Parents and Friends (P&F) from the whole school.  
 Community volunteers that helped with FEAST.  
 Other schools.  
 Other.
- 

What do you think were the benefits to your students  
and/or school?

---

---

On a scale of 0 to 10, how likely are you to recommend the FEAST program to others?

- 10, Extremely likely to Recommend
- 9
- 8
- 7
- 6
- 5
- 4
- 3
- 2
- 1
- 0, Not likely to Recommend

---

Were there any barriers in the classroom/school setting that impeded students undertaking the FEAST program?

Yes  No

---

Please describe the barriers in the classroom/school setting that, in your opinion, impeded students undertaking the FEAST program.

---

Were there any external barriers from outside of the school environment that impeded students undertaking the FEAST program?

Yes  No

---

Please describe the external barriers from outside of the school environment that, in your opinion, impeded students undertaking the FEAST program.



---

Was cost a barrier to delivering the program?

Yes  No

---

Please explain how "cost" is a barrier to delivering the program at your school, and what steps are required to help overcome this issue?

---

How did you find the process of finding volunteers to help you with the practical components of FEAST?

Please tick as many answers, as apply.

- Simple
- Quick
- Frustrating
- Complicated
- Time consuming
- Other

---

Please explain what other difficulties you had in finding volunteers to help you with the practical components of FEAST.

---

What was your favourite aspect of the FEAST program?

---

What aspects of the program had the greatest impact on your students?  
And, why?

---

Where there any aspects of the program you would suggest to OzHarvest to modify for future FEAST programs?

---

Did you complete the FEAST Program risk assessment prior to delivering the program to your students?

- Yes  
 No

---

Were any of your students harmed in the classroom setting over the course of the FEAST Program?

- Yes  
 No

---

How many of your students were harmed in the classroom setting over the course of the FEAST Program?

---

(Enter a Number)

---

What types of harms occurred to your students in the classroom setting over the course of the FEAST Program?

- Cut while using a kitchen knife  
 Injured while using a grater  
 Burn from an electric frying pan  
 An allergic reaction  
 Other

---

What "Other" type of harm occurred?

---

---

Will you continue implementing the FEAST program in your classroom?

- Yes
- No

---

What motivates / inspires you to continue implementing the FEAST program in your classroom?

---

What are the reasons you would not continue to implement the FEAST program in your classroom?

---

Do you have any other feedback, queries or comments?
